# Supplementary material
Source: publisher figshare collection journal article supplement (https://tandf.figshare.com/ndownloader/files/17563412)
Supplement: Supplementary file 1 [file 17563412]

**Table S3.** Justification for exclusion of full-downloaded articles

| Authors, year                          | Justification for exclusion                                                                                                                                                  |
|----------------------------------------|------------------------------------------------------------------------------------------------------------------------------------------------------------------------------|
| Anwarullah et al. 2017                 | Case-control study with no paraquat data.                                                                                                                                    |
| Ascherio et al. 2006                   | Case-control study with no paraquat data.                                                                                                                                    |
| Beghdadli et al. 2016                  | Case-control study with no paraquat data.                                                                                                                                    |
| Behari et al. 2001                     | Case-control study with no paraquat data.                                                                                                                                    |
| Beard et al. 2003                      | Cohort study with no paraquat data                                                                                                                                           |
| Brighina et al. 2008                   | Case-control study with no paraquat data.                                                                                                                                    |
| Caballero et al. 2018                  | Cross-sectional study with the outcome of interest being premature PD mortality. Analysis based on PD mortality was an exclusion criterion.                                  |
| Costello et al. 2009                   | Study with overlap of participants.                                                                                                                                          |
| Cheng et al. 2018                      | Study with overlap of participants.                                                                                                                                          |
| Chuang et al. 2016                     | Retrospective cohort study with no paraquat data                                                                                                                             |
| Das et al. 2011                        | Case-control study with no paraquat data.                                                                                                                                    |
| Du et al. 2014                         | Participants exposed to pesticides (including paraquat) did not present PD, but only magnetic resonance image (RMI) microstructural changes in the <i>substantia nigra</i> . |
| Firestone et al. 2005                  | Study with overlap of participants.                                                                                                                                          |
| Fong et al. 2007                       | Case-control study with no paraquat data.                                                                                                                                    |
| Fleming et al. 1994                    | Case-control study with no paraquat data.                                                                                                                                    |
| Furlong et al. 2015                    | Study with overlap of participants.                                                                                                                                          |
| Gatto et al. 2009                      | Study with overlap of participants.                                                                                                                                          |
| Gatto et al. 2010                      | Study with overlap of participants.                                                                                                                                          |
| Gorell et al. 1998                     | Case-control study with no paraquat data.                                                                                                                                    |
| Grant, Lantos, and Parkinson 1980      | Cerebral changes in patients who died of paraquat poisoning. Previous disease was not considered. Alterations indicate cerebral damage, but does not allow for PD diagnosis. |
| Goldman et al. 2012                    | Study with overlap of participants.                                                                                                                                          |
| Hancock et al. 2008                    | Case-control study with no paraquat data.                                                                                                                                    |
| Harding et al. 2017                    | Prospective cohort study with no paraquat data.                                                                                                                              |
| Herishanu, Kordysh, and Goldsmith 1998 | Case-control study with no paraquat data.                                                                                                                                    |
| Hertzman, Wiens, and Bowering 1990     | Study with overlap of participants.                                                                                                                                          |
| Hubble et al. 1993                     | Case-control study with no paraquat data.                                                                                                                                    |
| James et al. 2015                      | Cross-sectional study with no paraquat data.                                                                                                                                 |
| Kamel et al. 2014                      | Study with overlap of participants.                                                                                                                                          |
| Lee et al. 2012                        | Study with overlap of participants.                                                                                                                                          |
| Liew, Wang, and Bronstein 2014         | Case-control study with no paraquat data.                                                                                                                                    |
| Marder et al. 1988                     | Case-control study with no paraquat data.                                                                                                                                    |
| McCann et al. 1998                     | Case-control study with no paraquat data.                                                                                                                                    |
| Narayan et al. 2017                    | Study with overlap of participants.                                                                                                                                          |
| Nuti et al. 2004                       | Case-control study with no paraquat data.                                                                                                                                    |
| Palacios et al. 2014                   | Prospective cohort study with no paraquat data.                                                                                                                              |
| Pereira and Garrett 2010               | Case-control study with no paraquat data.                                                                                                                                    |
| Pouchieu et al. 2018                   | Study with overlap of participants.                                                                                                                                          |
| Rajput et al. 1987                     | No specific paraquat data. The study investigated the prevalence of PD after paraquat started to be used in the                                                              |

|                               |                                                                                                                                                                                                                                                                     |
|-------------------------------|---------------------------------------------------------------------------------------------------------------------------------------------------------------------------------------------------------------------------------------------------------------------|
|                               | province of Saskatchewan.                                                                                                                                                                                                                                           |
| Ritz and Fu 2000              | No paraquat data. The study tested the validity of a Geographic Information System (GIS)-based exposure assessment model.                                                                                                                                           |
| Ritz and Costello 2006        | Study with overlap of participants.                                                                                                                                                                                                                                 |
| Ritz et al. 2009              | Case-control study with no paraquat data. Also, cases of PD reported as the underlying cause of death in mortality records was an exclusion criterion.                                                                                                              |
| Ross et al. 2012              | No paraquat data. Autopsy of individuals exposed to organochlorines during mid-life in search for Lewy bodies and Lewy neurites in the brain. Since Lewy bodies are not exclusive of PD, it was not possible to assume PD diagnosis without a clinical correlation. |
| Sanyal et al. 2010            | Case-control study with no paraquat data.                                                                                                                                                                                                                           |
| Smargiassi et al. 1998        | Case-control study with no paraquat data.                                                                                                                                                                                                                           |
| Semchuk, Love, and Lee 1993   | Case-control study with only a single case of PD reported having worked with paraquat and no controls without PD were exposed.                                                                                                                                      |
| Semchuk and Love 1995         | Case-control study with no paraquat data.                                                                                                                                                                                                                           |
| Steenland et al. 2013         | Cross-sectional study with no paraquat data.                                                                                                                                                                                                                        |
| Stern et al. 1991             | Case-control study with no paraquat data.                                                                                                                                                                                                                           |
| Stefano et al. 1989           | Letter                                                                                                                                                                                                                                                              |
| Taylor et al. 1999            | Case-control study with no paraquat data.                                                                                                                                                                                                                           |
| Tsai et al. 2002              | Case-control study with no paraquat data.                                                                                                                                                                                                                           |
| Tomenson and Campbell 2011    | Retrospective cohort study based on Parkinson's Disease mortality. Analysis based on PD mortality was an exclusion criterion.                                                                                                                                       |
| van der Mark et al. 2014      | Study with overlap of participants.                                                                                                                                                                                                                                 |
| Wan and Lin 2015              | Study with no comparison group                                                                                                                                                                                                                                      |
| Wang, Semchuck, and Love 1994 | Case-control study with no paraquat data.                                                                                                                                                                                                                           |
| Wang et al. 2011              | Study with overlap of participants.                                                                                                                                                                                                                                 |
| Wang et al. 2014              | Case-control study with no paraquat data.                                                                                                                                                                                                                           |
| Werneck and Alvarenga 1999    | Case-control study with no paraquat data.                                                                                                                                                                                                                           |
| Wilk et al. 2006              | No paraquat data. The authors explored whether GSTP1 polymorphisms were associated with the age at onset of PD symptoms and whether that relation was modified by exposure to herbicides.                                                                           |
| Wong et al. 1991              | Case-control study with no paraquat data.                                                                                                                                                                                                                           |
| Wright and Keller-Byrne 2005  | Case-control study with no paraquat data.                                                                                                                                                                                                                           |
| Wu et al. 2012                | Neuroimaging study of acutely poisoned paraquat victims. It was not possible to assume a PD diagnosis.                                                                                                                                                              |

PD: Parkinson's Disease
